# Supplementary material for: The prognostic value of neutrophil-to-lymphocyte ratio in cholangiocarcinoma: a systematic review and meta-analysis
Source: PubMed Central journal article supplement (PMC9314341; doi:10.1038/s41598-022-16727-w), 2022-07-25

**Figure S1** Stratified Forest plots of the association between the NLR and OS

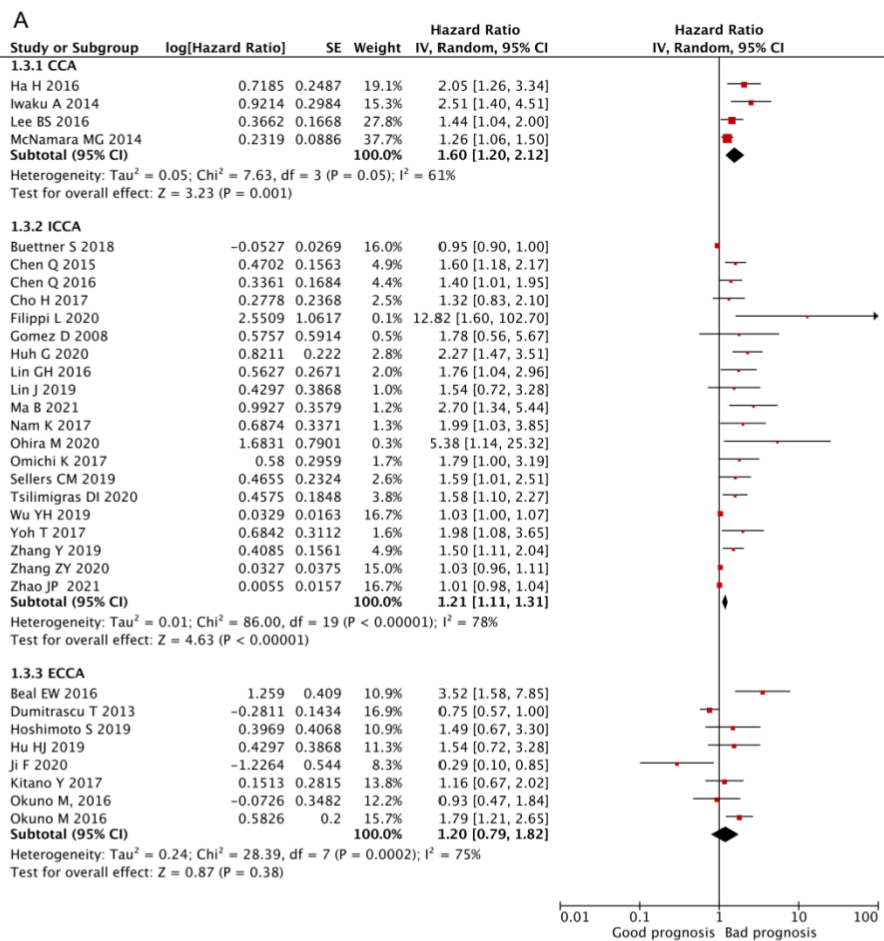

**B**

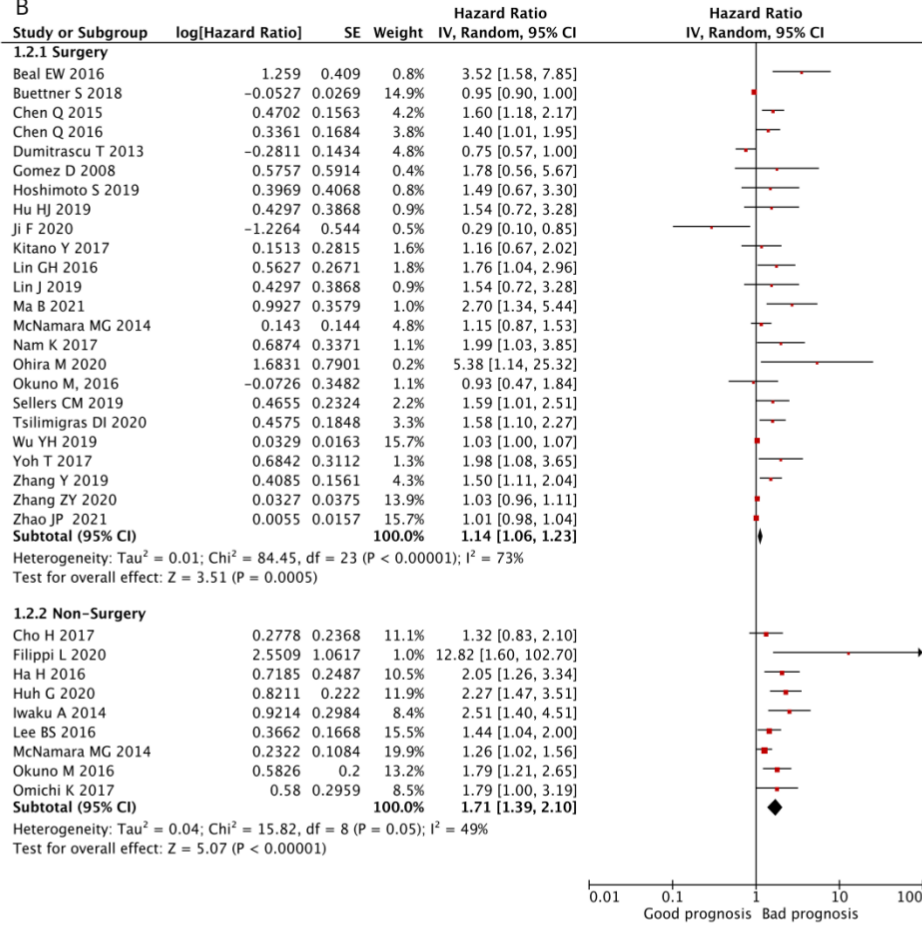

**C**

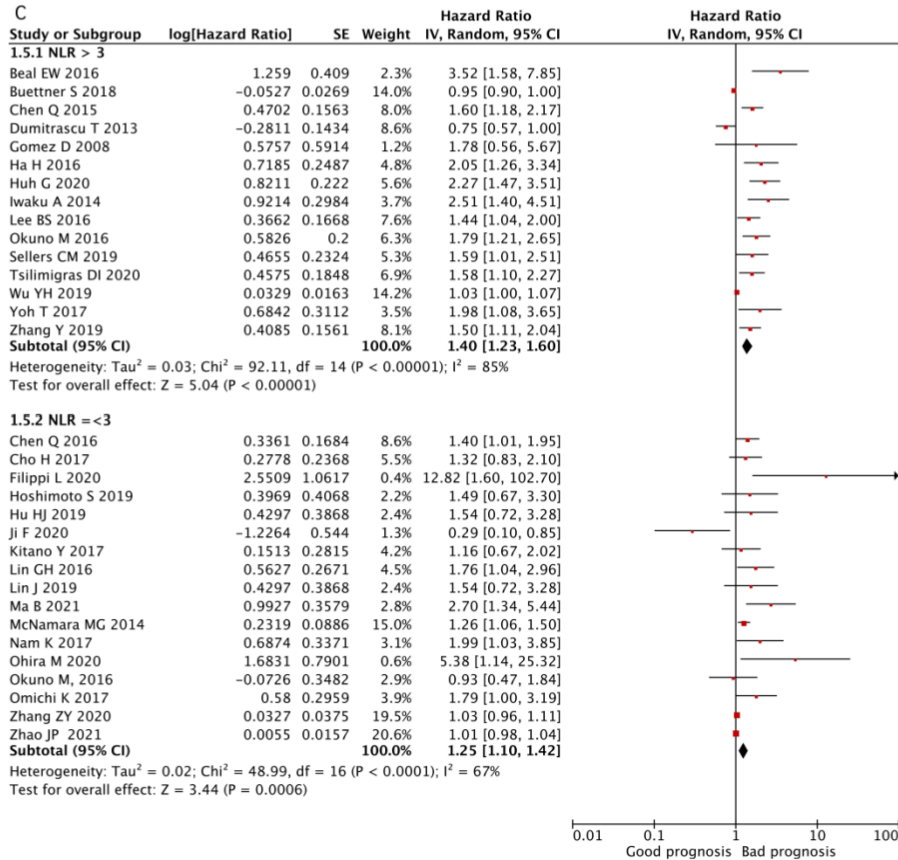

D

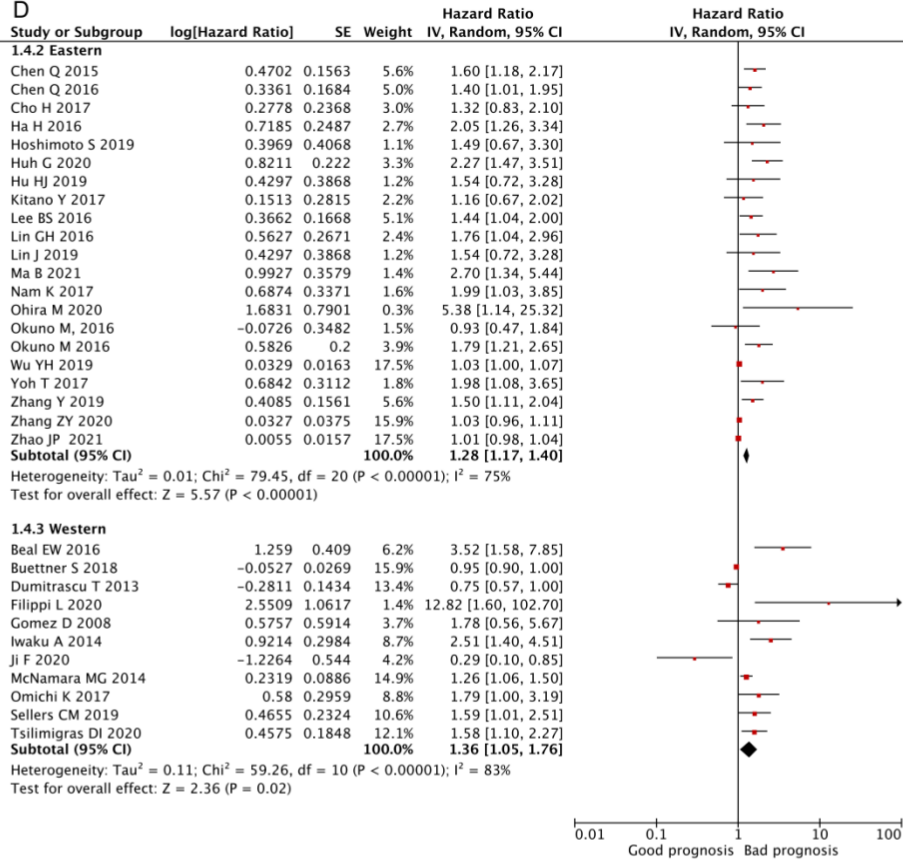

E

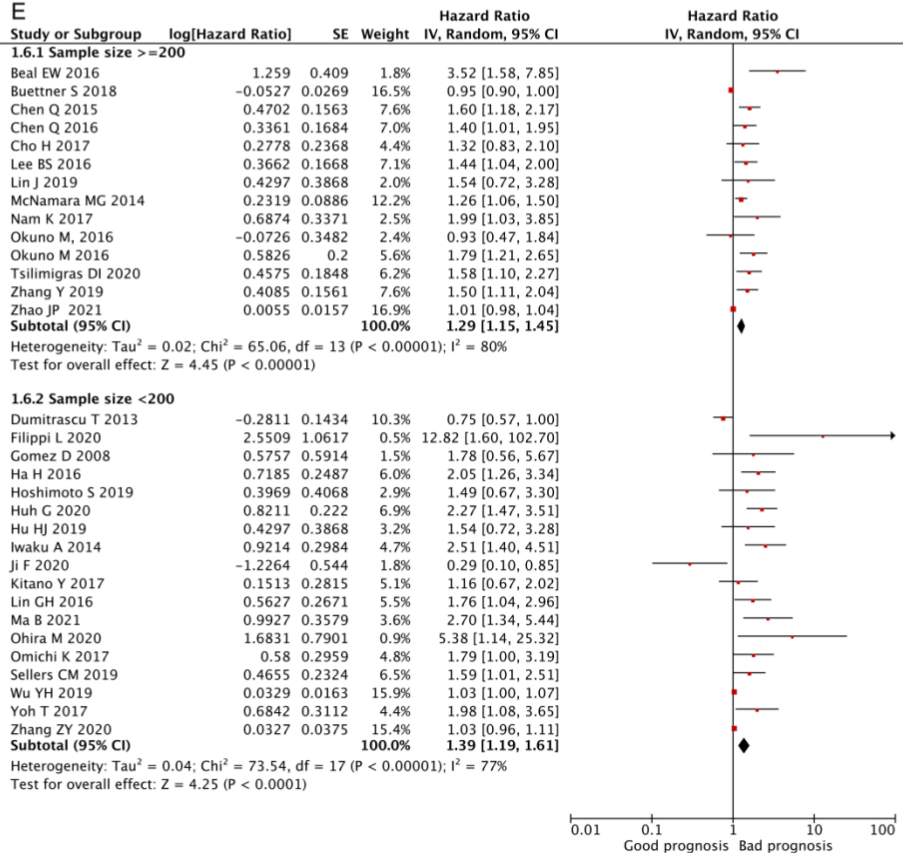

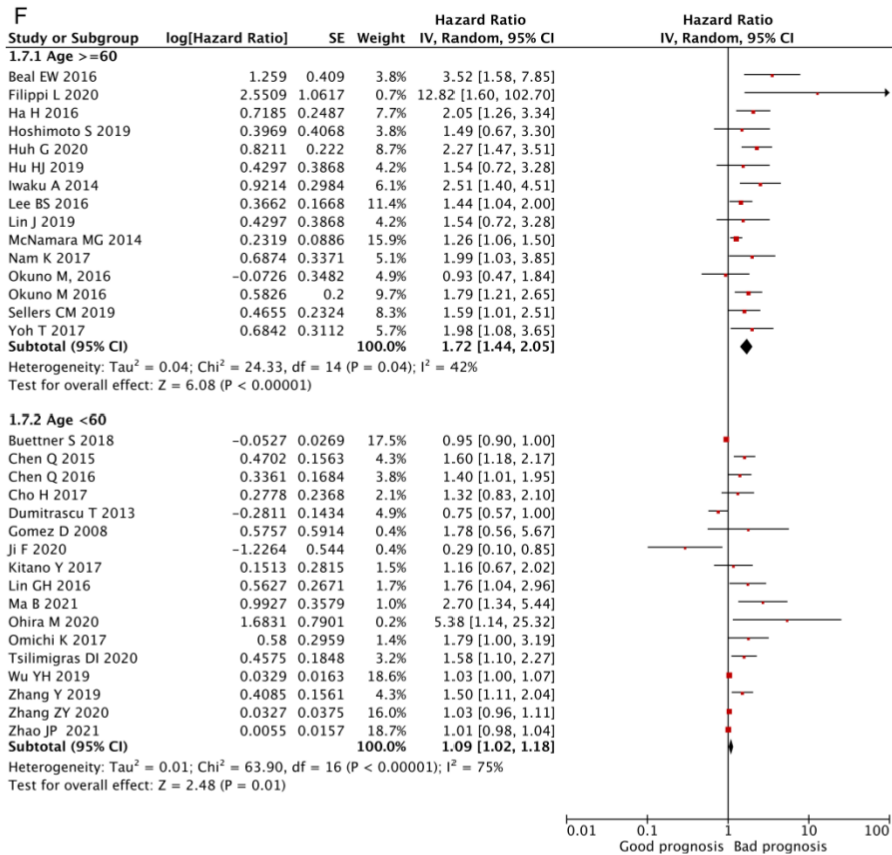

Subgroup analysis of association between the NLR and OS based on cancer type(A), treatment (B), NLR cut-off values(C), region(D), sample size (E) and age(F). A random-effects model was used. CCA, cholangiocarcinoma; ECCA, extrahepatic cholangiocarcinoma; ICCA, intrahepatic cholangiocarcinoma; OS, overall survival; NLR, neutrophil to lymphocytes ratio

**Figure S2** Stratified Forest plots of the association between the NLR and DFS

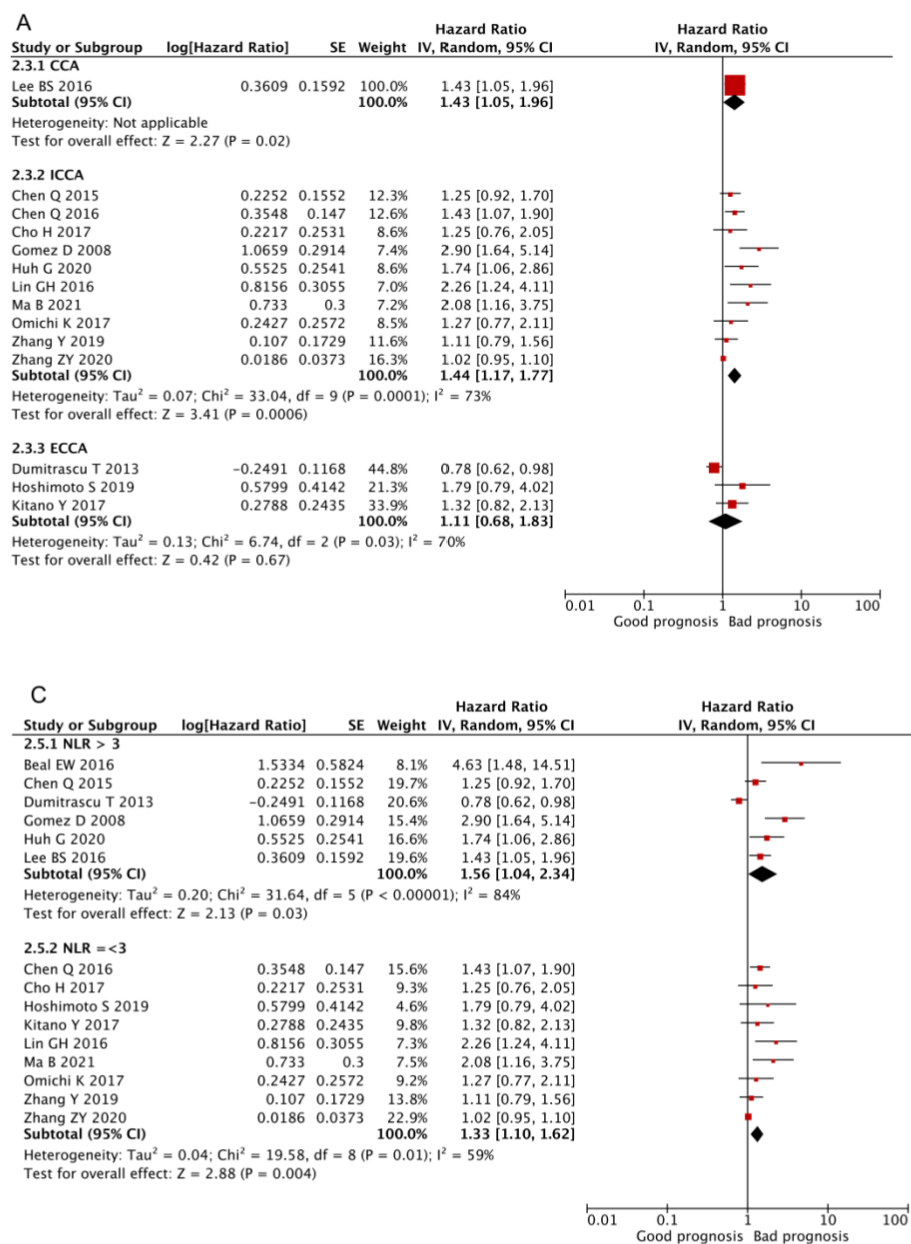

**B**

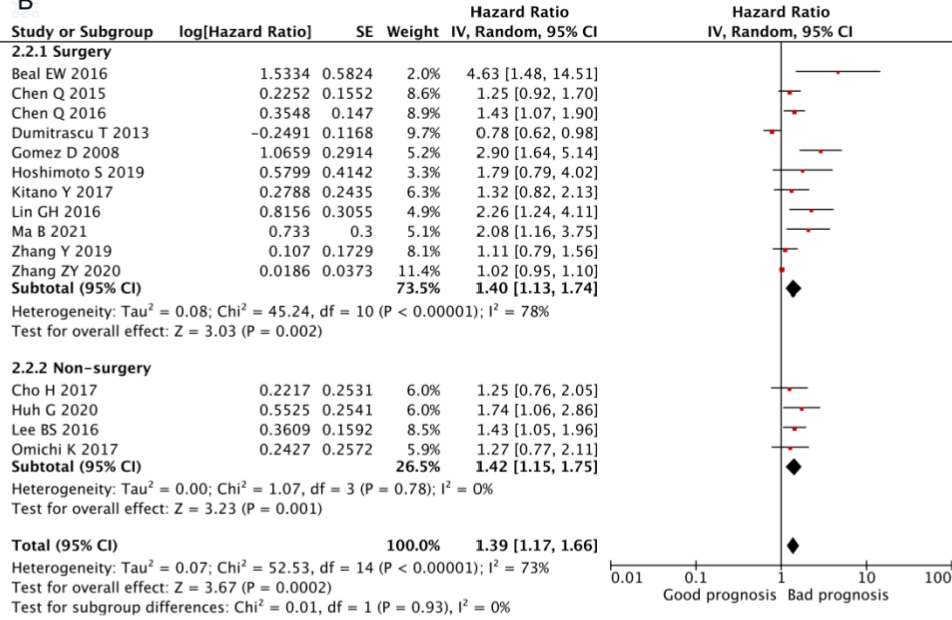

**D**

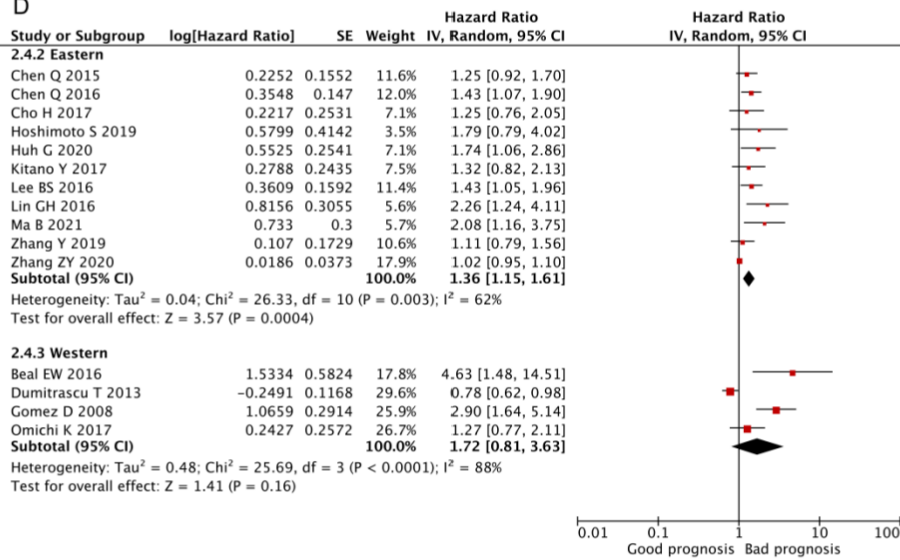

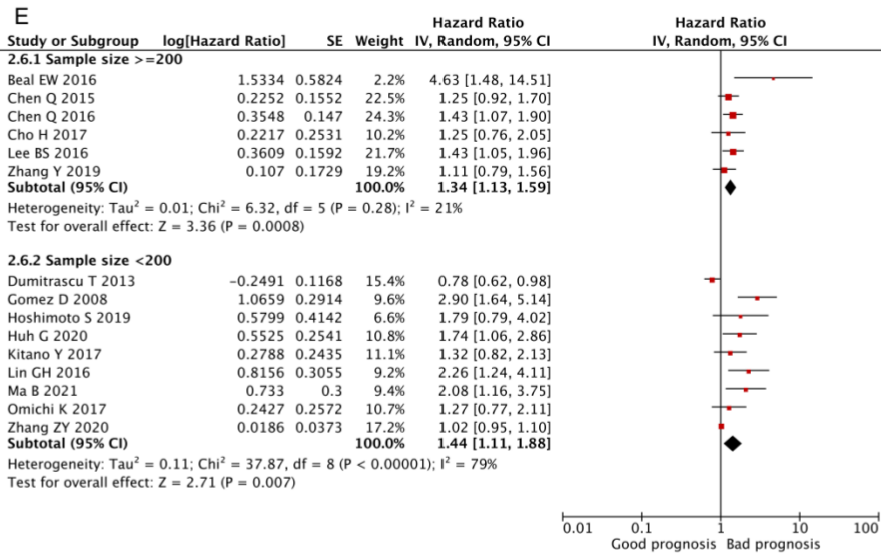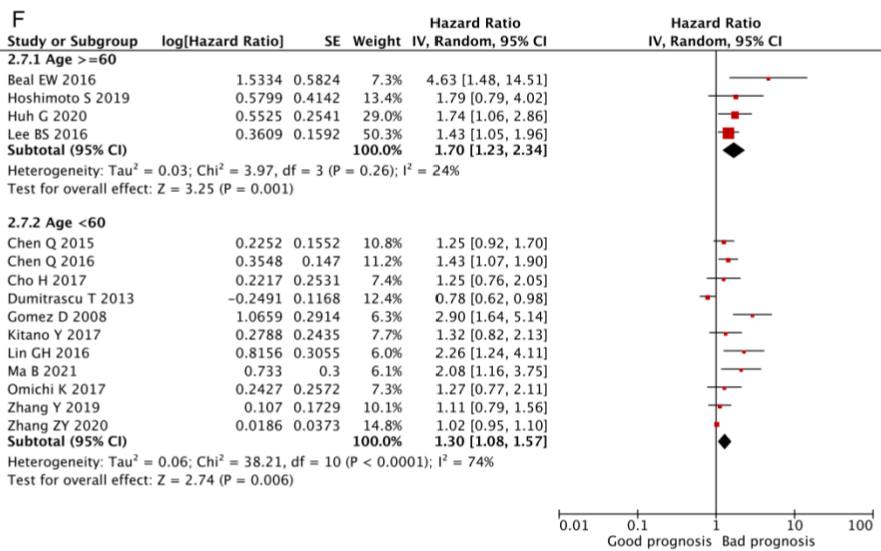

Subgroup analysis of association between the NLR and DFS based on cancer type (A), treatment (B), NLR cut-off values (C), region (D), sample size (E) and age (F). A random-effects model was used. CCA, cholangiocarcinoma; DFS, disease-free survival; ECCA, extrahepatic cholangiocarcinoma; ICCA, intrahepatic cholangiocarcinoma; NLR, neutrophil to lymphocytes ratio.

**Figure S3** Baujat plot of the investigated data of overall survival (A) and disease-free survival (B).

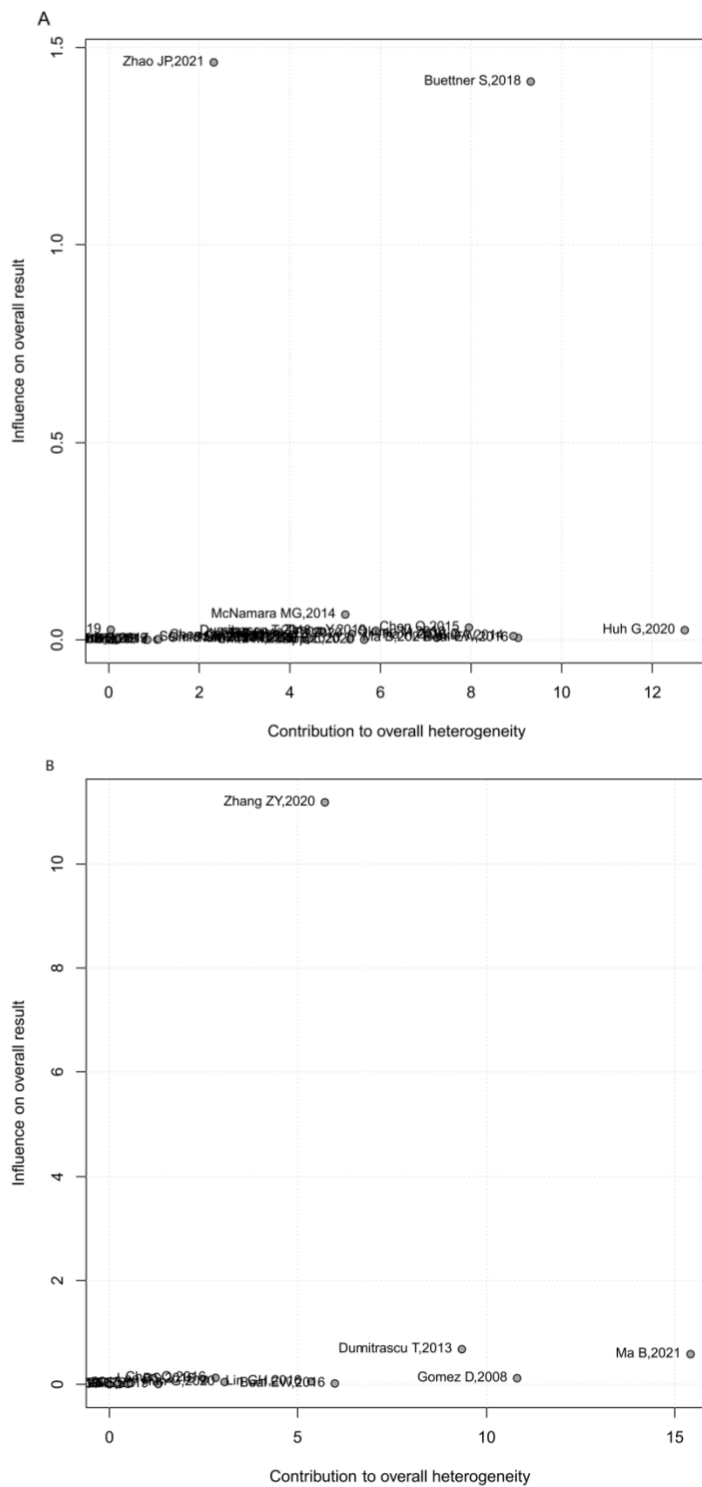

Baujat plots were used to assess contribution to the overall result and to heterogeneity. DFS, disease-free survival; NLR, neutrophil to lymphocytes ratio; OS, overall survival.



**Figure S4** Funnel plots of the investigated data of overall survival (A) and disease-free survival (B)

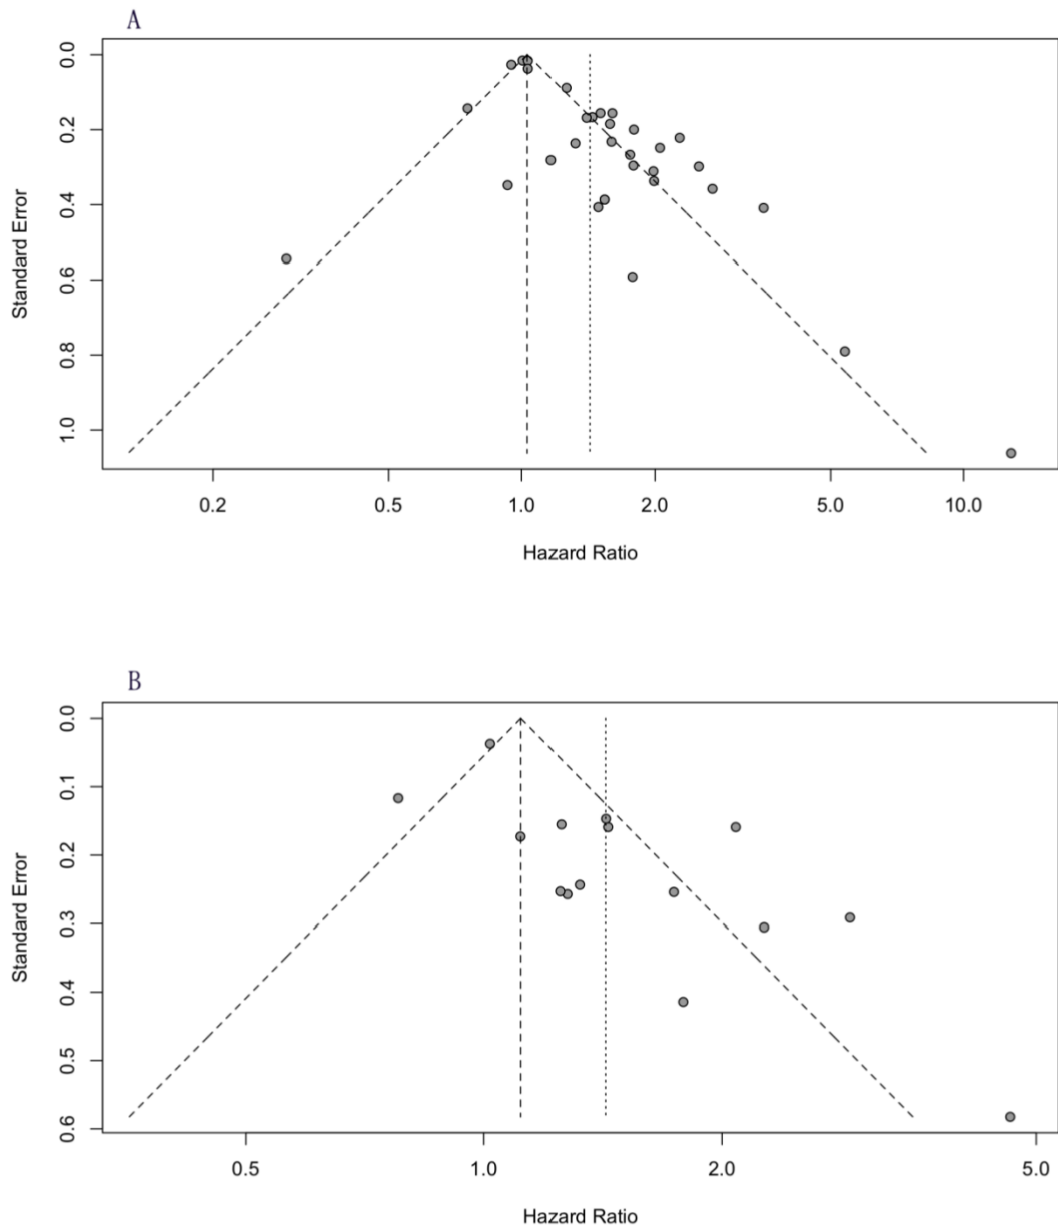

Supplement: 41598_2022_16727_MOESM1_ESM.pdf [file 41598_2022_16727_MOESM1_ESM.pdf]
